# Supplementary material for: Time-Resolved and Robust Lithium Plating Detection for Automotive Lithium-Ion Cells with the Potential for Vehicle Application
Source: MDPI journal article supplement (doi:10.3390/batteries9020097), 2023-01-31
Supplement: s1 [file s1]

# Time-Resolved and Robust Lithium Plating Detection for Automotive Lithium-Ion Cells with the Potential for Vehicle Application

Jan. P. Schmidt<sup>\*,a</sup>, Alexander Adam<sup>b</sup>, Johannes Wandt<sup>b</sup>

<sup>a</sup>*Chair of Systems Engineering for Electrical Energy Storage, Bavarian Center for Battery Technology, University of Bayreuth, 95448 Bayreuth, Germany*

<sup>b</sup>*Battery Cell Competence Centre, BMW Group, 80788 Munich, Germany*

<sup>\*</sup>Corresponding author

Email: Alexander.Adam@bmw.de (A. Adam), Jan.Schmidt@Uni-Bayreuth.de (J. P. Schmidt)

---

## Temperature dependence

The data shown in Figure 2 has been measured with an initial cell temperature of 25 °C. During fast charging, the cell temperature increases by up to 20K (see Figure 4a in [1] for details). In addition, even though initial conditions were identical, the maximum temperature varies for different fast charging cycles for about 10K. Hence, the proposed method is valid in the temperature range relevant for automotive fast charging. The fact that the increase of  $\Delta T_{\text{Re-Im}}$  is not simply an artefact of the increased cell temperature can also be highlighted by a comparison of 2C CCCV vs P03 CCCA charging: Only the former 2C CCCV charging shows an increase of  $\Delta T_{\text{Re-Im}}$  (Figure 2b) while both charging protocols cause identical maximum temperatures of around 37°C (Figure 4a in [1]).

The applicability of the proposed method for low temperature charging needs to be checked; this is beyond the scope of the present manuscript.

## Correlation between impedance measurement and cell temperature

The data shown in Table S1 summarizes the information of the linear regression line to calculate the cell temperature based on the real or imaginary part of the impedance measurement for each cycle during the test procedure. The regression coefficients  $x_0$  and  $\alpha$  are determined for each cycle during a temperature change at open circuit voltage conditions. Therefore, the cell temperature and impedance are measured at the same time. The maximum value of the real and imaginary part ( $\text{Re}_{\text{max}}$  and  $\text{Im}_{\text{max}}$ ) depict a measurement point in a temperature range between 27.8°C and 28.3°C. The

minimum value of the real and imaginary part ( $Re_{min}$  and  $Im_{min}$ ) depict a measurement point in a temperature range between 24.8 °C and 25.3 °C.

Table S1: Information of the linear regression line to calculate the cell temperature based on impedance data.

| Cycle | Fast-charge profile | $Re_{max}$<br>[mΩ] | $Re_{min}$<br>[mΩ] | $x_{0,Re}$ | $\alpha_{Re}$ | $Im_{max}$<br>[mΩ] | $Im_{min}$<br>[mΩ] | $x_{0,Im}$ | $\alpha_{Im}$ |
|-------|---------------------|--------------------|--------------------|------------|---------------|--------------------|--------------------|------------|---------------|
| 1     | 1C CCCV             | 0.843              | 0.826              | 172.209    | -174.721      | 0.361              | 0.346              | -36.267    | 177.586       |
| 2     | 1C CCCV             | 0.842              | 0.826              | 164.524    | -165.594      | 0.362              | 0.347              | -31.262    | 163.185       |
| 3     | 1C CCCV             | 0.842              | 0.826              | 170.697    | -173.056      | 0.362              | 0.347              | -35.160    | 173.892       |
| 4     | 1C CCCV             | 0.842              | 0.827              | 185.228    | -190.468      | 0.36               | 0.348              | -37.577    | 180.489       |
| 5     | P01                 | 0.842              | 0.825              | 160.836    | -161.210      | 0.364              | 0.35               | -34.808    | 172.196       |
| 6     | P01                 | 0.841              | 0.825              | 158.296    | -158.251      | 0.364              | 0.35               | -32.783    | 166.144       |
| 7     | P01                 | 0.841              | 0.825              | 158.008    | -157.944      | 0.365              | 0.351              | -34.183    | 169.788       |
| 8     | P01                 | 0.841              | 0.822              | 180.630    | -185.014      | 0.367              | 0.352              | -45.123    | 200.502       |
| 9     | P02                 | 0.841              | 0.825              | 158.575    | -158.637      | 0.366              | 0.352              | -34.876    | 171.262       |
| 10    | P02                 | 0.84               | 0.824              | 159.699    | -160.041      | 0.366              | 0.353              | -35.688    | 173.194       |
| 11    | P02                 | 0.841              | 0.825              | 158.942    | -159.136      | 0.367              | 0.353              | -37.327    | 177.555       |
| 12    | P02                 | 0.84               | 0.822              | 181.447    | -186.100      | 0.368              | 0.354              | -50.296    | 213.764       |
| 13    | P03                 | 0.84               | 0.825              | 159.653    | -160.053      | 0.368              | 0.355              | -38.526    | 180.409       |
| 14    | P03                 | 0.84               | 0.824              | 159.082    | -159.406      | 0.368              | 0.355              | -39.603    | 183.085       |
| 15    | P03                 | 0.84               | 0.824              | 155.324    | -154.909      | 0.369              | 0.355              | -38.461    | 179.691       |
| 16    | P03                 | 0.84               | 0.822              | 187.101    | -192.994      | 0.37               | 0.356              | -55.078    | 225.921       |
| 17    | 1.5C CCCV           | 0.839              | 0.824              | 171.398    | -174.422      | 0.369              | 0.356              | -41.851    | 188.453       |
| 18    | 1.5C CCCV           | 0.838              | 0.823              | 172.057    | -175.391      | 0.37               | 0.357              | -41.160    | 186.281       |
| 19    | 1.5C CCCV           | 0.837              | 0.822              | 174.487    | -178.546      | 0.37               | 0.358              | -43.544    | 192.512       |
| 20    | 1.5C CCCV           | 0.836              | 0.817              | 206.449    | -217.171      | 0.373              | 0.358              | -56.814    | 229.082       |
| 21    | P04                 | 0.836              | 0.821              | 179.292    | -184.627      | 0.372              | 0.359              | -47.334    | 202.548       |
| 22    | P04                 | 0.834              | 0.82               | 181.078    | -187.145      | 0.371              | 0.359              | -47.418    | 202.540       |
| 23    | P04                 | 0.831              | 0.818              | 197.456    | -207.412      | 0.372              | 0.36               | -49.653    | 208.538       |
| 24    | P04                 | 0.829              | 0.812              | 232.199    | -249.918      | 0.373              | 0.36               | -69.026    | 261.816       |
| 25    | P05                 | 0.829              | 0.817              | 218.450    | -233.456      | 0.372              | 0.362              | -60.013    | 235.549       |
| 26    | P05                 | 0.829              | 0.817              | 208.089    | -220.944      | 0.373              | 0.362              | -55.864    | 223.997       |
| 27    | P05                 | 0.829              | 0.817              | 217.967    | -233.001      | 0.373              | 0.362              | -59.270    | 232.978       |
| 28    | P05                 | 0.828              | 0.818              | 225.467    | -242.149      | 0.372              | 0.363              | -70.706    | 264.171       |
| 29    | P01                 | 0.828              | 0.817              | 215.389    | -229.945      | 0.374              | 0.364              | -60.503    | 235.742       |
| 30    | P01                 | 0.828              | 0.817              | 214.493    | -228.913      | 0.375              | 0.364              | -60.241    | 234.883       |
| 31    | P01                 | 0.829              | 0.816              | 211.197    | -224.862      | 0.374              | 0.364              | -62.048    | 239.603       |
| 32    | P01                 | 0.829              | 0.809              | 208.167    | -221.196      | 0.379              | 0.365              | -72.423    | 267.614       |
| 33    | 2C CCCV             | 0.828              | 0.816              | 222.595    | -238.927      | 0.376              | 0.366              | -66.624    | 251.370       |
| 34    | 2C CCCV             | 0.828              | 0.816              | 217.493    | -232.692      | 0.376              | 0.366              | -65.703    | 248.873       |
| 35    | 2C CCCV             | 0.827              | 0.815              | 224.537    | -241.484      | 0.377              | 0.365              | -66.906    | 252.109       |
| 36    | 2C CCCV             | 0.825              | 0.81               | 237.247    | -257.415      | 0.378              | 0.366              | -82.772    | 295.076       |
| 37    | 2.5C CCCV           | 0.825              | 0.811              | 235.254    | -254.793      | 0.378              | 0.367              | -71.809    | 264.794       |
| 38    | 2.5C CCCV           | 0.825              | 0.811              | 238.739    | -259.125      | 0.377              | 0.366              | -75.398    | 274.922       |
| 39    | 2.5C CCCV           | 0.824              | 0.81               | 240.620    | -261.410      | 0.378              | 0.367              | -96.297    | 331.566       |
| 40    | 2.5C CCCV           | 0.825              | 0.807              | 244.619    | -266.358      | 0.379              | 0.367              | -106.176   | 358.042       |

Figure S1 shows the regression lines based on the information of Table . The change of the regression line with respect to the fast-charging cycle results from the aging of the cell during cycling.

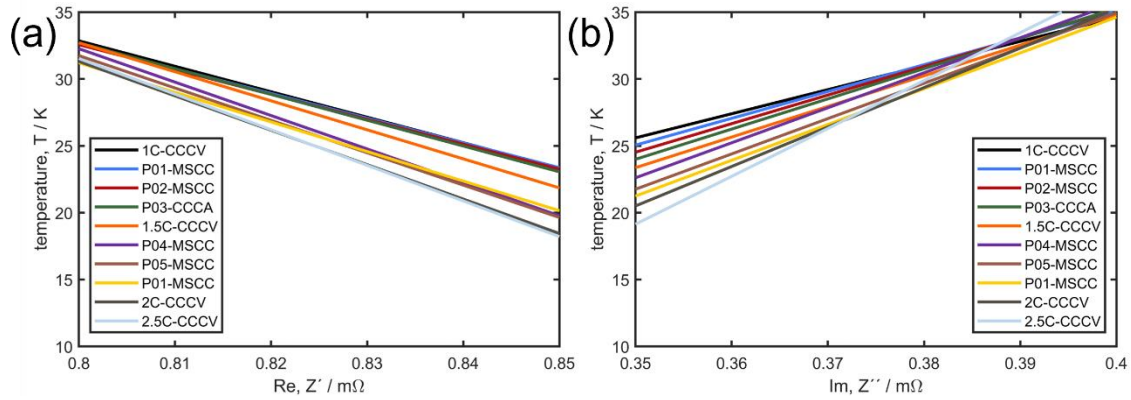

Figure S1: Regression lines to determine the cell temperature for each fast-charging profile based on impedance measurements: (a) real part in correlation to cell temperature and (b) imaginary part in correlation to cell temperature.

### Critical fast charging with the occurrence of lithium plating

Figure S2 shows the current and voltage signal as well as the impedance and temperature behavior of a cell during a 2.5C-CCCV charging process as an example of critical fast charging with the occurrence of lithium plating. The difference of  $T_{Re}$  and  $T_{Im}$  can be attributed to the occurrence of lithium-plating.

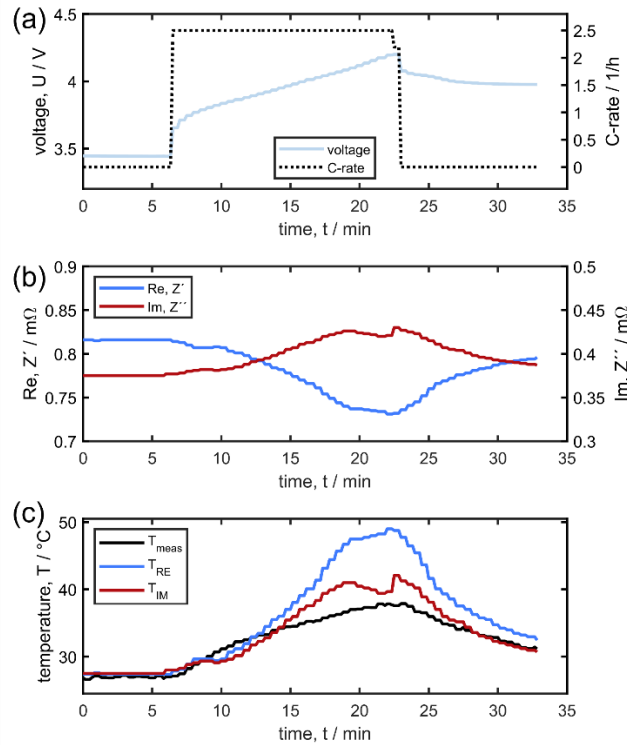

Figure S2: Critical fast charging with 2.5C at 25 °C initial temperature with the occurrence of lithium plating (see Figure 2b), a) cell potential and current, b) real and imaginary cell impedance measured at 3125 Hz, c) cell temperatures measured with an external temperature sensor and derived from the cell impedance.
