# Supplementary material for: Time-Resolved and Robust Lithium Plating Detection for Automotive Lithium-Ion Cells with the Potential for Vehicle Application
Source: MDPI journal article supplement (doi:10.3390/batteries9020097), 2023-01-31
Supplement: s1 [file s1]

Archive with 1 entries (1 files):
- batteries-2047846-supplementary.pdf
